# Supplementary material
Source: Royal Society of Chemistry journal article supplement (doi:10.1039/d6fb00107f)
Supplement: d6fb00107f1.pdf [file d6fb00107f1.pdf]

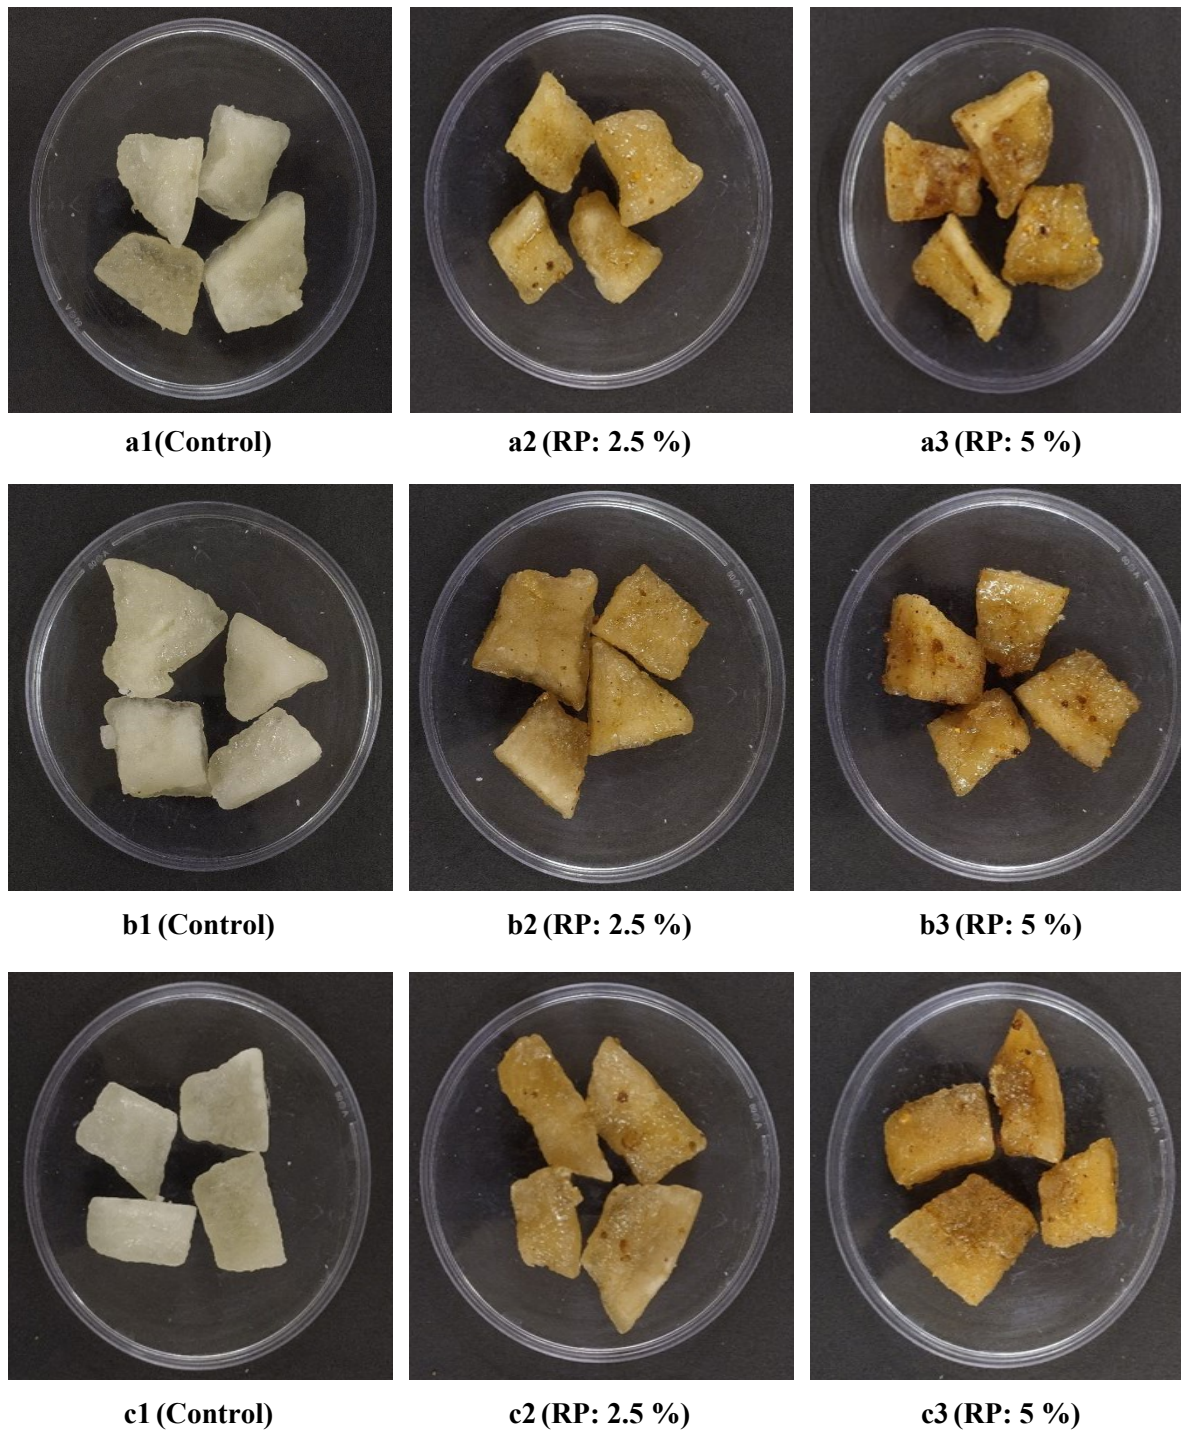

**Fig. S1: Ash gourd candies supplemented with rosehip powder (RP) blanched for (a) 0 (b) 2.5 and (c) 5 min**

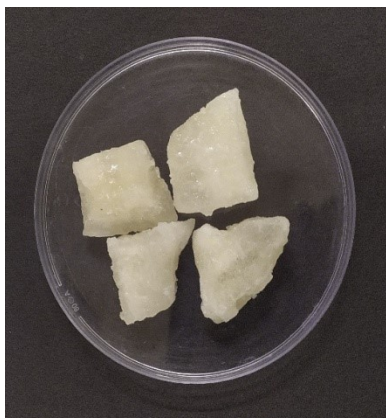

**a1 (Control)**

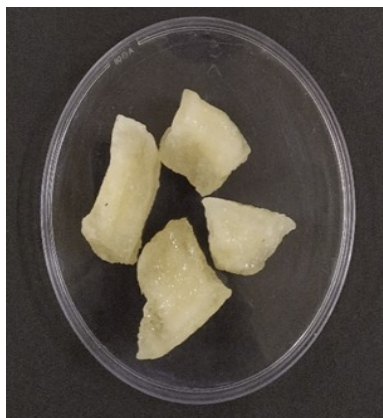

**a2 (RE: 5 %)**

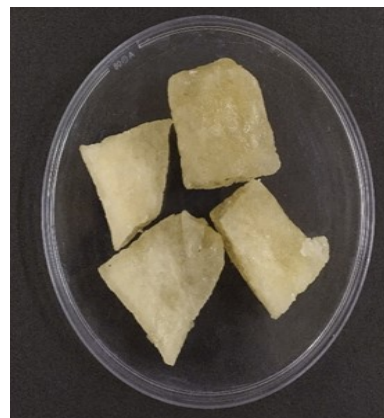

**a3 (RE: 10 %)**

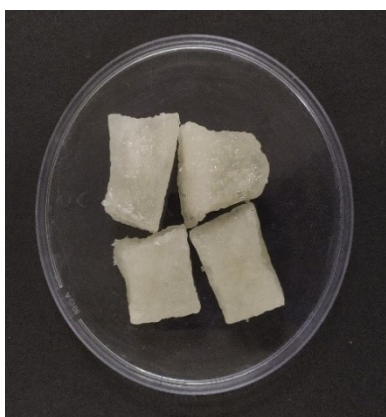

**b1 (Control)**

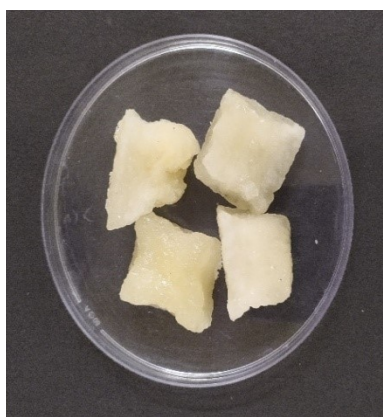

**b2 (RE: 5 %)**

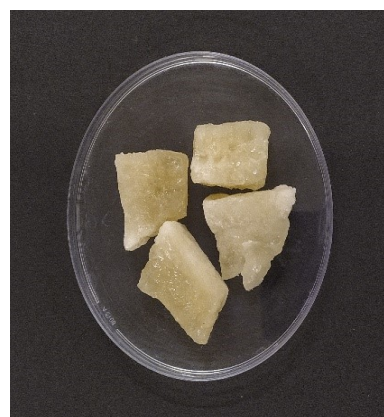

**b3 (RE: 10 %)**

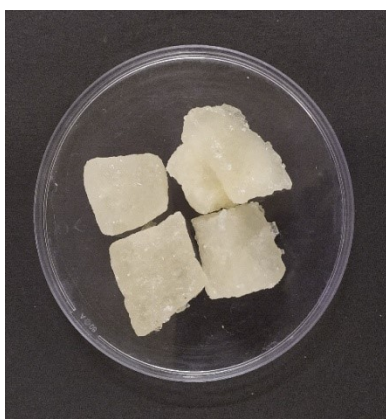

**c1 (Control)**

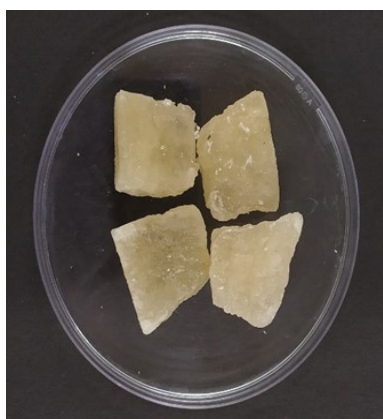

**c2 (RE: 5 %)**

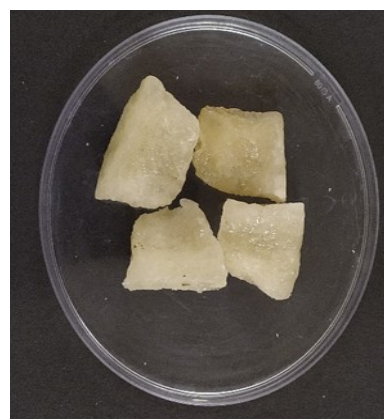

**c3 (RE: 10 %)**

**Fig. S2: Ash gourd candies supplemented with rosehip extract (RE) blanched for (a) 0 (b) 2.5 and (c) 5 min**

**Table S1a: Eigen value for biplot for RP treatments**

|     | <b>Eigen value</b> | <b>Variance (%)</b> | <b>Cumulative variance</b> |
|-----|--------------------|---------------------|----------------------------|
| PC1 | 5.56               | 50.58               | 50.58                      |
| PC2 | 3.41               | 30.98               | 81.56                      |
| PC3 | 1.06               | 9.64                | 91.19                      |
| PC4 | 0.46               | 4.19                | 95.38                      |
| PC5 | 0.29               | 2.66                | 98.04                      |
| PC6 | 0.15               | 1.40                | 99.44                      |
| PC7 | 0.04               | 0.35                | 99.79                      |
| PC8 | 0.02               | 0.21                | 100.00                     |
| PC9 | 0.00               | 0.00                | 100.00                     |

**Table S1b: Eigen value for biplot for RE treatments**

|     | <b>Eigen value</b> | <b>Variance (%)</b> | <b>Cumulative variance</b> |
|-----|--------------------|---------------------|----------------------------|
| PC1 | 6.97               | 63.36               | 63.36                      |
| PC2 | 2.55               | 23.18               | 86.54                      |
| PC3 | 0.71               | 6.45                | 92.99                      |
| PC4 | 0.53               | 4.81                | 97.80                      |
| PC5 | 0.16               | 1.43                | 99.22                      |
| PC6 | 0.05               | 0.44                | 99.66                      |
| PC7 | 0.03               | 0.31                | 99.97                      |
| PC8 | 0.00               | 0.03                | 100.00                     |
| PC9 | 0.00               | 0.00                | 100.00                     |

**Table S2a: Loading values for biplot for RP treatments**

|             | <b>PC1</b> | <b>PC2</b> | <b>PC3</b> | <b>PC4</b> | <b>PC5</b> | <b>PC6</b> | <b>PC7</b> | <b>PC8</b> | <b>PC9</b> |
|-------------|------------|------------|------------|------------|------------|------------|------------|------------|------------|
| TPC         | 0.41       | 0.08       | 0.08       | -0.17      | -0.04      | 0.07       | 0.45       | 0.22       | -0.40      |
| TFC         | 0.39       | 0.07       | 0.22       | -0.06      | -0.52      | -0.13      | -0.45      | 0.25       | 0.40       |
| DPPH        | 0.34       | 0.01       | -0.09      | 0.82       | 0.04       | 0.36       | 0.14       | -0.04      | 0.21       |
| FRAP        | 0.4        | 0.1        | -0.02      | -0.10      | -0.28      | -0.29      | 0.28       | -0.70      | -0.03      |
| MCA         | 0.38       | 0          | -0.13      | -0.12      | 0.70       | -0.05      | -0.41      | -0.21      | 0.03       |
| Antidiabeti |            |            |            |            |            |            |            |            |            |
| Activity    | 0.41       | 0.04       | 0.05       | -0.14      | 0.27       | -0.22      | 0.20       | 0.49       | 0.14       |
| Color       | -0.27      | 0.4        | -0.02      | 0.06       | 0.20       | -0.37      | 0.41       | 0.04       | 0.55       |
| Texture     | -0.03      | 0.53       | 0.00       | 0.22       | -0.04      | -0.07      | -0.10      | 0.23       | -0.49      |
| Flavor      | -0.02      | 0.53       | -0.05      | 0.15       | -0.01      | -0.25      | -0.32      | -0.14      | -0.15      |
| Taste       | 0.01       | 0.46       | 0.37       | -0.33      | 0.08       | 0.67       | 0.04       | -0.15      | 0.20       |
| Overall     | 0.07       | 0.17       | -0.88      | -0.25      | -0.19      | 0.25       | 0.01       | 0.11       | 0.13       |

**Table S2b: Loading values for biplot for RE treatments**

|             | PC1   | PC2   | PC3   | PC4   | PC5   | PC6   | PC7   | PC8   | PC9   |
|-------------|-------|-------|-------|-------|-------|-------|-------|-------|-------|
| TPC         | -0.34 | -0.22 | -0.10 | 0.26  | 0.03  | 0.16  | 0.66  | 0.32  | 0.04  |
| TFC         | -0.32 | -0.17 | 0.09  | 0.58  | 0.23  | -0.16 | -0.02 | -0.20 | -0.49 |
| DPPH        | -0.24 | -0.32 | 0.45  | -0.49 | 0.61  | -0.11 | 0.02  | -0.03 | 0.08  |
| FRAP        | -0.32 | -0.32 | -0.11 | 0.17  | -0.12 | -0.21 | -0.68 | 0.35  | 0.14  |
| MCA         | -0.3  | -0.24 | -0.39 | -0.46 | -0.28 | 0.06  | 0.00  | -0.42 | -0.45 |
| Antidiabeti |       |       |       |       |       |       |       |       |       |
| Activity    | -0.35 | -0.18 | -0.26 | -0.18 | -0.17 | 0.16  | 0.09  | 0.22  | 0.37  |
| Color       | -0.18 | 0.53  | -0.18 | -0.26 | 0.16  | -0.29 | 0.03  | 0.55  | -0.41 |
| Texture     | -0.31 | 0.24  | 0.47  | 0.00  | -0.20 | 0.66  | -0.19 | 0.07  | -0.17 |
| Flavor      | -0.33 | 0.21  | 0.32  | 0.01  | -0.41 | -0.57 | 0.20  | -0.25 | 0.24  |
| Taste       | -0.27 | 0.35  | -0.43 | 0.14  | 0.47  | 0.14  | -0.11 | -0.35 | 0.32  |
| Overall     | -0.31 | 0.35  | 0.09  | 0.00  | -0.02 | 0.05  | -0.07 | -0.14 | 0.15  |
